# Supplementary material
Source: MDPI journal article supplement (https://www.mdpi.com/1999-4907/15/5/814)
Supplement: s1 [file s1]

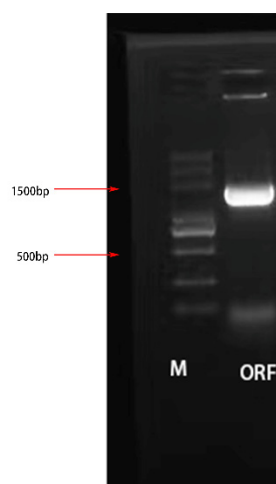

**Figure S1.** Cloning of the open reading frame of *PmMYB45*. M: NormaLRun™ 250bp - II DNA ladder; ORF: open reading frame for *PmMYB45*.

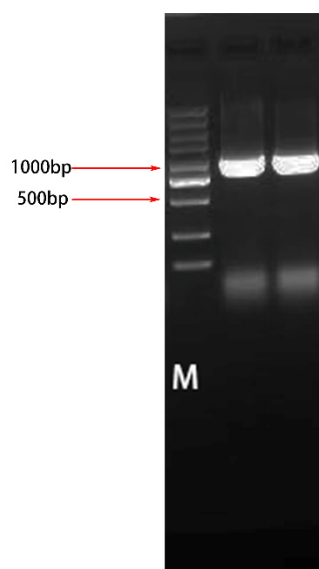

**Figure S2.** Cloning of the *PmMYB45* promoter

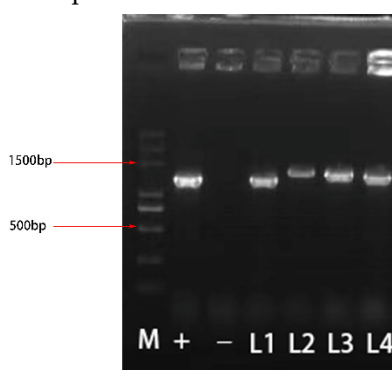

**Figure S3.** PCR assay for overexpression of *PmMYB45* tobacco. M: DL 5000 plus DNA Marker; +: positive control. -: wild type (negative control); L1-L4: transgenic strains

**Table S1.** Primer sequences used in this study

| Name of primer   | Primer sequences                                |
|------------------|-------------------------------------------------|
| PmMYB45-F        | ATGGGGCGCACGCCTTGCTG                            |
| PmMYB45-R        | TTAATTCGAAGGATACTGTG                            |
| Pro- PmMYB45-F   | AGGTCGCCACCTCAAGCC                              |
| Pro- PmMYB45-R   | ATTTTACAAGAAGATCGTCCTCC                         |
| PmMYB45-GFP-F    | GGCGTGCAGGTCGACTCTAGAATGGGGCGCACGCCTTGC         |
| PmMYB45-GFP-R    | GCCCTTGCTCACCATGGATCCATTCTGAAGGATACTGTGATGATGG  |
| PmMYB45-GUS-F    | CATGATTACGCCAAGCTTCGTTGAACCTCCTCATTG            |
| PmMYB45-GUS-R    | GGGGATCCTCTAGACGGTTAGGGTTACAGAGCCCCGCCTGCA      |
| PmMYB45-PGBKT7-F | ATGGCCATGGAGGCCGAATTCATGGGGCGCACGCCTTGC         |
| PmMYB45-PGBKT7-R | CCGCTGCAGGTCGACGGATCCATTCTGAAGGATACTGTGATGATGG  |
| T7-F             | GGCAAAACGATGTATAAATGA                           |
| T7-R             | TAATACGACTCACTATAGG                             |
| PmMYB45-PBI121-F | GAGAACACGGGGGACTCTAGAATGGGGCGCACGCCTTGC         |
| PmMYB45-PBI121-R | CGATCGGGGAAATTCGAGCTCTTAATTCGAAGGATACTGTGATGATG |
| PBI121-Q-F       | ATTGGGCACTGCATTTTTCTTCAAC                       |
| PBI121-Q-R       | AGTGTTCTCCAGCCTCCTTCT                           |
| PBI121-DNA-F     | GACAGTGGTCCCAAAGA                               |
| PBI121-DNA-R     | AAACAGCGGAAGAGTAAG                              |
| PmTUA-F          | CAAACCTTGGTCCCGTATCCTC                          |
| PmTUA-R          | CACAGAAAGCTGCTCATGGTAA                          |
| NtActin7-F       | TTTCCTAGCATTGTGGGTCG                            |
| NtActin7-R       | CCCCTCTTGGATTGAGCTTC                            |
| Nt4CL-F          | GCAGCGATTTTGATTATGCAGA                          |
| Nt4CL-R          | AGTTCTTTTCCTAATGGTGCAGC                         |
| NtPAL1-F         | TGCCAACAGGATAAATGAATGCAG                        |
| NtPAL1-R         | CACCATTCCATTCTTGAGACAT                          |
| NtCAD-F          | ATGAAGTGGTGGGAGAAG                              |
| NtCAD-R          | GGGTTTGCCATCAGTGTA                              |
| NtHCT-F          | AAAACACCACCAACCCTG                              |
| NtHCT-R          | TCCTGCCAACATCTCGTA                              |

**Table S2.** Gene name and GenBank ID in this study

| Gene name | GenBank ID         |
|-----------|--------------------|
| PmMYB006  | Potri.001G005100.1 |
| PmMYB126  | Potri.003G219900.1 |
| PmMYB050  | Potri.013G056400.1 |
| PmMYB051  | Potri.013G056500.1 |
| PmMYB060  | Potri.019G036300.1 |
| PmMYB061  | Potri.019G036400.1 |
| PmMYB201  | Potri.014G100800.1 |
| PmMYB123  | Potri.003G144200.1 |

|          |                    |
|----------|--------------------|
| PtMYB153 | Potri.003G144300.1 |
| PtMYB113 | Potri.017G126000.1 |
| PtMYB118 | Potri.017G125600.1 |
| PtMYB120 | Potri.017G125700.1 |
| PtMYB119 | Potri.017G125800.1 |
| PtMYB117 | Potri.017G125900.1 |
| PtMYB155 | Potri.002G173900.1 |
| PtMYB009 | Potri.001G086700.1 |
| PtMYB7   | ABD60281.1         |
| VvMYB5   | RVW48712.1         |
| VvMYB5b  | AAX51291.1         |

**Table S3. Summary of acronyms**

| Abbreviation | Full name in English               |
|--------------|------------------------------------|
| 6-BA         | 6-Benzylaminopurine                |
| NAA          | 1-Naphthaleneacetic acid           |
| Cef          | Cefotaxime sodium                  |
| Kan          | Kanamycin sulphate                 |
| MS           | Murashige and Skoog Medium         |
| CCoAOMT      | caffeoyl-CoA O-methyltransferase   |
| PAL          | phenylalanine ammonia-lyase        |
| 4CL          | p-coumarate CoA ligase             |
| COMT         | caffeic acid 3-O-methyltransferase |
| CAD          | cinnamyl alcohol dehydrogenase     |
| HCT          | Hydroxy cinnamoyl transferase      |
| CCR          | cinnamyl-CoA reductase             |
| AS           | Acetosyringone                     |
| KT           | kinetin                            |

>PmMYB45

ATGGGGCGCACGCCTTGCTGCTCGAAAATGGGTCTGAATAGGGGTCCATGGACTCCC  
GAGGAGGACGATCTTCTTGTAATAATATTTCAAAGCATGGAGAAGGAGGCTGGAGA  
ACACTTCCTAAGAAAGCAGGGTTGCTGCGTTGTGGCAAAGCTGTAGACTGCGATGG  
ATGAATTATCTGCGGCCTGATGTTAAACGAGGACAGATTTTACCCGATGAGGAAGAC  
CTTATTCTCAGACTGCATCGCCTTCTCGGAAACAGGTGGTCCTTGATAGCTGGGCGA  
ATGCCTGGGCGCACTGATAACGAAATCAAGAACTACTGGAATACGCACCTTAGTAAA  
AACTGATCAGTGAAGGGATAGATCCAAGGACCCACAAACCCCTGGCTGAATCAGAG  
CTTGAGCAGTTACGCAGTGACAAAAGCCAAGGAGTTGACAACGTAAACTCTGAAGAT  
ACCAACAACCCAACTTCTGATTCTCAGAAAATTCAGCTGGAAGAACTGAAACAGCA  
ATGTCTGACAACATTGAATCGTGCAAAGTTGTTGACAACATTGGCCATTCCCCAGAA  
CTTAGCAAGAACGTCAATGATCATCTGATACATCAGCAATTGATAGCCTTCACACT  
GTTGCAAATTCCTCCAGCACTGCCATAGCTACTCAGTCTACTTATATTGGAAGTGAG  
GGTACTTACTCTTCCGCTGTTTCTGATTTAGGAAAAGGATCAGGTAAGCTGCCACAA  
CAATCAGTTAATGGAGTTGTTTCATGTTAATCAACCCCTCACAGATTCCATATTGCTAC

CCTAATCAGGAATTGAGCTTAGAGGGCCATGATTGGTCTCCATATTTGAGAACAAAC  
AACTGACAAGTAGCTTTTTTCATGGCACCCCCATCAGGGCTAGACAGTGTCCCACAT  
TTCTCAGATCAAGGTTATCAAGCAACTGCTAGAAATGCTTTGAGAGGTGGACATCAA  
TATAACGAAAGTTTTTCAGCCAACTTCATTCAACACCGTGCAGCCACTGAAGAAAAC  
CATCAAGAAAGCTACAAGGAAAACGATGGTGCAAATTCCTGTACCCTTCAAGCCAAC  
ATAAATCCACTGGGCCCACTACTGAAGATTGCAATTCAGATATACTCTCTTATTTT  
CTGGAGTCCTTTATGACTGAGGATCAGTTGCTGGACGAAGCCAATTACAAGCATGCA  
ACACCAGCTTCAGCTTCTGTTTCACAACATGTGCAGCACCTCTCTCAGGCTCAAGCT  
CCGAATCATGACTACGAAATGTGGTCTGTAGTGTCCCCATCATCACAGTATCCTTCG  
AATTAA

**>Pro- PmMYB45**

AGGTCGCCACCTCAAGCCTGGATCCCACACTTGCTCACATTGAACCTCCACATTGAC  
ATTTACAACATATGCTGGTGCCGACTTGAACCTCCTTCACAACTCATCACATCTTAGGG  
GGTAGTGGATGGCACAATCGGAATGACACCCTGCAAGAACAAGTGCCTAAGAACATC  
CACCACCCTAGTCCCATAAACTCATGCAACAACAATGCTCAAACAAGAATGCTTG  
AACAGATATCCCTTGTTGCCTCTTGAACTTTAGTGCGCCTTTGCTTGAAATGGCAT  
GCATGATAAGCTCCATTAAAAACAAGTACCATGTGGGTGAGGATGATGATGCCTCGTA  
GAGTAGCCTCTACGGCCAATTGTCACTAATTAAGAAATATAAAAAATAATTTATTTGT  
TATATTTAAATAATTATAAATAAAAAATATTAATTTACATAAATTTAACTTTATAAGA  
AAACATAAATATTTATTTAAAAAATTGATGAAATGTTTTGAGGATTTTCCTCTTTCAA  
ATTCGAAACAACATTTAATCCAAGTTTTATACCTATAAATTTTTTTTCGATAAAAATT  
GATAATTTAAGTTTAATTAATTTATAAAACGGTTTAATCCCAACCTTTGGAAGGAAG  
CCTTAATTTTGGATAAAGAAAGTGATGAATGCCTAGTAGTCCAAATGCCATTCATGA  
CTATTGAGGTAAGAAGAGGGGTATCATACTTTGAATGTTGCTTCCCCACGAAGGAA  
GCGATGGCATTAAATCCATTTGCCTAGAAAAATACAACCGGTACCGGTTGGCCAAACA  
GAAATGTACACATCATCTCATCCAACTCATTAACCCTTCACTCACTCGCTCACTGC  
GATGCAATTAACTCGTGGAGAATCTCGCCAGCTAACCTCAAACCTCCAACGTGAATTT  
CCATTTAGAAAATCATAGTTTCAATCAAGGGCTTATAATGTCGTCCTCTTCTTTGGC  
ACTGATTGGATTGGATCACATCGAATTGATGTTTTTGTAAAAACATGATTAGGTAAG  
CCTAACTGTTTCATCGTCGATTGGGCACTGCATTTTTCTTCAACTTCCGAGTTCAGT  
TCAGTTTCAGTTTTAGGTTTTGTTTCCGATCGATCGTTCCCGTGGGTTTGAGCGCAA  
GAAGCTGTAGATCCCGACCAGTATGGAGTCACTTTGAATGAATTACAAGCTCGCTCG  
TCTTCTCTCGTTTCTTCAGAATCAGAGTTAGGGATTCGTGAATCCCTGCGGGCTATT  
TGAAATCCGCGCCAAACATTCGCATTTCGATTCAATCTGACAGCACAGATCTCGTTG  
TTATAAACGATTTTCACTTTTTCAGATTGACTTTTAGAGTTTCTGCAGGCGGGGCTCT  
GTAACCCTAACCGTGCTGTGGTGAAATG
